# Guidance of zoospores by potassium gradient sensing mediates aggregation

## AUTHORS

Eric Galiana<sup>1</sup>, Celine Cohen<sup>2</sup>, Philippe Thomen<sup>2</sup>, Catherine Etienne<sup>1</sup>, Xavier Noblin<sup>2</sup>

## ADRESSES

1. Université Côte d'Azur, INRA, CNRS, ISA, Sophia Antipolis, France.

2. Université Côte d'Azur, CNRS UMR 7010, Institut de Physique de Nice, Parc Valrose, 06108 Nice, France.

## EMAIL ADRESSES

Eric Galiana, [eric.galiana@inra.fr](mailto:eric.galiana@inra.fr)

Catherine Etienne, [catherine.mura@inra.fr](mailto:catherine.mura@inra.fr)

Xavier Noblin, [xavier.noblin@unice.fr](mailto:xavier.noblin@unice.fr)

Celine Cohen, [celine.cohen@unice.fr](mailto:celine.cohen@unice.fr)

Philippe Thomen, [Philippe.THOMEN@unice.fr](mailto:Philippe.THOMEN@unice.fr)

## Corresponding authors

Eric Galiana, [eric.galiana@inra.fr](mailto:eric.galiana@inra.fr)

Xavier Noblin, [xavier.noblin@unice.fr](mailto:xavier.noblin@unice.fr)

**Keywords** : *Phytophthora*, zoospore, Negative chemotaxis, Bioconvection, Aggregation

**Running Head**: From K<sup>+</sup> sensing to zoospore aggregation

**Word number**: 7379

1       **Competing interests**

2           The authors declare that they have no competing interests.

3

4       **Funding**

5           This work has been supported by the French government, through the UCAJEDI  
6           Investments in the Future project managed by the National Research Agency (ANR) with  
7           the reference number ANR-15-IDEX-01; through the “Credits Scientifiques Incitatifs” of  
8           the University of Nice Sophia-Antipolis and the “Action Recherche” of the INRA Plant  
9           Health and Environment Division.

10

11       **Authors’ contributions**

12           EG and XN designed experiments.

13           EG and CE carried droplet and millifluidic analyses.

14           XN, CC and PT carried out microfluidic analyses.

15           EG, XN, CC, PT wrote the manuscript.

16

17       **Acknowledgements**

18           The authors thank the Microscopy Platform-Sophia Agrobiotech Institut- INRA 1355-  
19           UNS-CNRS 7254- INRA PACA Sophia Antipolis for access to instruments and technical  
20           advice. The authors would like to thank Fernando Peruani, Emiliano Perez Ipiña (LJAD,  
21           Nice) and Laurent Counillon (LP2M, Nice) for fruitful discussions.

22

1 **ABSTRACT**

2 Biflagellate zoospores of some phytopathogenic *Phytophthora* species spontaneously  
3 aggregate within few minutes in suspension. Depending on species auto-aggregate formation  
4 results from bioconvection or from a sequence bioconvection-positive chemotaxis. In this study,  
5 we show that *P. parasitica* zoospores may form aggregates upon application of a  $K^+$  gradient in  
6 particular geometric arrangements. Based on the use of macro- and microfluidic devices, in  
7 addition to time-lapse live imaging both in the vertical and horizontal planes, we defined (i) the  
8 spatiotemporal and concentration scale evolution within the gradient in correlation with (ii) cell  
9 distribution and (iii) metrics of zoospore motion (velocity, trajectory). The results indicated that  
10  $K^+$ -induced aggregates result from a single bi-phasic temporal sequence involving negative  
11 chemotaxis and then bioconvection in a  $K^+$  gradient concentration scale [0-17 mM]. Each  $K^+$ -  
12 sensing cell undergoes a forward-to-backward movement within a threshold range of 1-4mM,  
13 thereby forming progressively a swarm. Once a critical population density is achieved zoospores  
14 form a plume which undergoes a downward migration leading to aggregate formation on the  
15 support surface. We discuss putative sources for  $K^+$  gradient generation in natural environment  
16 (zoospore population, microbiota, plant roots, soil particles), and implication for events  
17 preceding inoculum formation on host plant.

18

## 1           **1. Introduction**

2           Within Oomycetes the *Phytophthora* genus includes some of the most destructive plant  
3 pathogens to manage causing destructive diseases on crops and natural ecosystems worldwide.  
4 They grow as filamentous coenocytic hyphae and move mainly as unicellular zoospores.  
5 Zoospore motility is critical for successful infection. To reach potential hosts a flagella-mediated  
6 random motility allows zoospores to explore environment much more efficiently than spreading  
7 by Brownian motion alone. The locomotor apparatus consists in two flagella, a whiplash one  
8 directed posteriorly and a tinsel one directed anteriorly [1, 2]. Flagella assembly and function  
9 appear to depend at least on a G $\alpha$ -subunit protein and a bZip transcription factor and dynein-  
10 based molecular motors [3, 4].

11           A bias on the random motility may be imposed by exogenous signals. Zoospores possess  
12 sensory systems which confer the ability to respond to chemical gradients (chemotaxis), oxygen  
13 (aerotaxis), ionic fields (electrotaxis) or light (phototaxis). To target plant tissues they detect  
14 gradients of a variety of compounds including ions, plant isoflavones, amino acids, sugars [5-7].  
15 For example, zoospores of *Phytophthora palmivora* exhibit anodal electrotaxis in electrical fields  
16  $\geq 0.5$  V/m comparable in size to the physiological fields around roots [8]. When a zoospore  
17 reaches a potential infection site, the cell drops its flagella, synthesizes a primary cell wall and  
18 produces a germ tube before host tissue penetration [1, 9-11].

19           Zoospores also exhibit the ability to control their motility in response to self-produced  
20 signals. They constitute swarm or swim towards encysted spores leading to auto-aggregation  
21 (autotaxis) [12, 13] or to biofilm formation on plant surface [14, 15]. The incidence of such

1 multicellular structures on plant infection has been largely neglected, the pathogenic process  
2 being considered until recently at the unicellular level for investigating the interaction with the  
3 host. Some data now support the hypothesis according to which *Phytophthora* ability for a  
4 multicellular behavior contributes to the dynamics of the interaction with a host through  
5 interspecific or intraspecific cell-to-cell signaling [14, 16]. How zoospores perceive cell density,  
6 transduce signal(s) and govern auto-aggregation is poorly understood. Mathematical and  
7 experimental data indicate that auto-aggregation in *Phytophthora* species results from  
8 bioconvection leading to plume formation [17] or from a sequential combination of  
9 bioconvection and then chemotaxis between plumes [13]. It is well described that *Phytophthora*  
10 species produce and use molecules to monitor zoospore density but no auto-attractant has  
11 been identified so far. The *P. parasitica* zoospores produce an AI-2-like signal (but not N-Acyl  
12 homoserine lactones) which could drive quorum sensing [18]. They also secrete cAMP a  
13 putative chemoeffector during biofilm formation [19].

14 Behavior of zoospores in response to change in ionic conditions suggests that cationic  
15 fluxes could be involved in collective motion but their nature and their role remain to be  
16 established.  $\text{Ca}^{++}$  plays a central role in autonomous encystment, adhesion, germination and  
17 auto-aggregation [12] but does not directly trigger cooperative behaviors of zoospores and acts  
18 more like a secondary messenger [18, 20].  $\text{K}^+$  homeostasis influences the locomotion and  
19 encystment of zoospores. High external concentrations (5-10 mM) of potassium salts reduce the  
20 swimming speed of and cause the *P. palmivora* zoospores to swim in a jerky fashion [5].  
21 Potassium sensing provokes negative chemotaxis of zoospores of *Phytophthora palmivora* [6].

1            Seeking to characterize which signals may alter zoospore random motility and initiate  
2 auto-aggregation or biofilm formation, we got evidence that aggregation of *P. parasitica*  
3 zoospores is elicited through perception of monocationic gradients in a particular geometric  
4 arrangement. Using macro- and microfluidic systems combined with time-lapse live imaging for  
5 measuring fluorescent intensity of impermeant cation probes we defined characteristics of K<sup>+</sup>  
6 gradients and zoospore motion.

7

## 1           **2. Material and methods**

### 2           **2.1 Zoospore suspension preparation**

3           Mycelium of *Phytophthora parasitica* (isolate 310, *Phytophthora* INRA collection, Sophia-  
4 Antipolis) was routinely cultured on malt agar at 24°C in the dark. For zoospore production,  
5 mycelium was grown for one week in V8 liquid medium at 24°C under continuous light. The  
6 material was then drained, macerated and incubated for a further four days on water agar (2%).  
7 The zoospores were released by a heat shock treatment: incubation for 30 min at 4°C followed  
8 by incubation for 20 minutes at 37°C. Ten milliliters (per Petri dish  $\Phi$ 100mm) of 2mM Mes [2-  
9 (N-Morpholino) ethanesulfonic acid]-NaOH buffer pH 6,5 was added between incubations.  
10 Excepted when mentioned zoospore concentration was calibrated to  $5 \cdot 10^5$  cells/ $\mu$ l.

### 11           **2.2. Droplet assay**

12           Three chemotaxis devices were used for zoospore motion studies. A first one was the  
13 droplet assay. A controlled profile of the signal was generated by applying a [1mM-1M] gradient  
14 in a local and oriented-manner to a freshly prepared suspension of zoospores so as to reach a  
15 more or less steady profile by diffusion. The basic operation involved microinjection of putative  
16 chemo effectors (1/200, V/V) at the periphery of droplets (200-500  $\mu$ L) including zoospores and  
17 deposited on glass sides or PDMS (Polydimethylsiloxane) stamps. The qualitative and  
18 quantitative zoospore response occurred by analyzing chemoeffector-induced cell trajectories.  
19 Various conditions (ionic composition and strength, pH, nutritive resource, cell density) were  
20 assayed leading to the identification of K<sup>+</sup> and Na<sup>+</sup> sensing as a primary signal for zoospore  
21 aggregation.

### 1            **2.3.    Passive dispersion system used to generate ionic gradient**

2            A passive dispersion system was used to generate a diffusion gradient for tracking  
3 simultaneously extracellular concentration of potassium and zoospore distribution. Cells were  
4 preloaded with 2 $\mu$ M Asante Potassium Green-2 (APG-2 TMA+ salt, Teflabs, 3622), a potassium-  
5 specific and non-permeant fluorescent dye. Fifty microliters of cell suspension were placed in a  
6  $\mu$ -chamber ( $\mu$ -Slide VI – Flat, Ibbidi size l:17 mm; w: 3.8 mm; h: 400  $\mu$ m) before application of 0.5  
7  $\mu$ l of 500mM KCl. At different time points, each  $\mu$ -chamber content was observed using a  
8 confocal microscope (LSM 880-Zeiss) and the Tile Scan tool. Image sizes of 1.2 mm x 1.2 mm  
9 were generated from the application point and along the length. APG-2 was excited with a  
10 488nm argon laser and the fluorescence emission was captured using the channel mode (band  
11 pass 510-590nm). The distance between the application point and the upper position in the  
12 chamber suitable for zoospore motion was determined using the transmission-photomultiplier.  
13 The first 1,2mmx0,4mm corresponding to this position was divided in 3 technical replicates  
14 (0,4x0,4) to measure mean APG-2 fluorescent intensity in each area. The values of higher ionic  
15 concentration suitable for zoospore motion was calculated from the difference between APG-2  
16 FI measured at this position, after and before potassium application, and in reference to FI  
17 values measured with a range of discrete concentrations. Image analyses were done with the  
18 ZEN 2 software (Zeiss).

### 19            **2.4.    Microfluidic device**

20            The third device dedicated to capture immediate response of zoospores at the single cell  
21 level consisted in a PDMS microfluidic circuit for submitting zoospores to a continuous flow



1 presenting a gradient of potassium concentration. The device is presented on Figure 5A). Three  
2 channels ( $h^* \times w^* = 0.05 \text{ mm} \times 0.1 \text{ mm}$ ) intersect as a cross and fuse into a last channel with  
3 much larger width ( $H \times W = 0,2 \text{ mm} \times 1 \text{ mm}$ ) which is called the chemotactic chamber where the  
4 spores will be observed. Spores are injected in the middle inlet and the 100 mM KCl solutions  
5 injected in the two lateral channels. The device was fabricated using soft lithography techniques  
6 [21] all the steps being realized in the clean room of Institut de Physique de Nice. Molds in SU-8  
7 exposed at a resolution of 50800 DPI are covered with 10:1 Sylgard PDMS to be cured. After  
8 unmolding and puncturing for inlets, plasma bonding on clean glass slides is used to seal the  
9 channels. Teflon tubing directly inserted in the PDMS holes are used to connect the solutions  
10 reservoirs (2 ml) to the system. Liquid flows are driven using a pressure controller (Fluigent) in  
11 the range 0-100 mbar between the three inlets and the outlet which is at atmospheric pressure.  
12 The main interest of this controller is that changes of pressure can be done rapidly, allowing to  
13 reach quickly the desired conditions around the spores in the chamber. A high-speed camera  
14 (Phantom v7.11) was used and placed on an inverted microscope Zeiss Axiovert 200M with a  
15 x10 objective to acquire movies at a speed of 200 fps.

## 16 **2.5. Microscopy for image acquisition along horizontal or vertical axes**

17 Zoospore motion was captured using different instruments of the Microscopy Platform-  
18 Sophia Agrobiotech Institute (INRA 1355-UCA-CNRS 7254- INRA PACA Sophia Antipolis): the  
19 digital microscope VHX-2000 (Keyence); the inverted confocal microscope LSM 880 (Zeiss); the  
20 axioImagerZ1 (Zeiss) equipped for bright and epifluorescence, as well as with the AxioCam MRm  
21 camera. An Axioskop (Zeiss) microscope mounted vertically enables imaging of zoospores

1 moving in a vertical plan. To achieve this, the microscope was rotated by 90°, appropriately  
2 supported on the back of its frame along the horizontal axis, and with its stage properly  
3 positioned with a polystyrene serving as a chock. Using these instruments, movie acquisition  
4 was controlled by 3D profile VHX-H3M (Keyence) or ZEN (Zeiss) software and resulted to  
5 sequences from 10 to 30 seconds at 20-30 frames per second.

## 6 **2.6. Image analysis**

7 Dynamics of zoospore motion was first investigated by single-particle tracking with  
8 different image-processing algorithms available as plugins in the ImageJ or Fiji software  
9 libraries. Prior further analysis, processing of phase contrast zoospore consisted to TIFF format  
10 conversion, image inversion, threshold adjustment and binary conversion. The  
11 Velocity\_Measurement\_Tool plugins enabled to generate kymographs. The MosaicSuite [22]  
12 allowed us to define trajectories. Image size was adjusted as cells corresponded to 3 to 5 pixel  
13 particles. The TrackMate plugin [23] was used to examine motion metrics. Frame sequences  
14 were analyzed by a time step of two seconds [Initial processing used criteria: estimated blob  
15 diameter, 10µm; Auto initial thresholding; linking max distance, 30 µm; gap-closing max  
16 distance, 15 µm; gap-closing max frame,1]. Utilizing generated track statistics, only paths  
17 defined continuously for at least 1,5s were selected for further treatment of  
18 TRACK\_MEAN\_SPEED data. Manual Tracking (<https://imagej.nih.gov/ij/plugins/track/track.html>)  
19 was used to analyze high cell density or the linear-rotational transition.

20



## 1           **3. Results**

### 2           **3.1. Potassium and sodium induces zoospore aggregation in a concentration-specific** 3           **manner**

4           The droplet assay (Figure 1A) was first used both to evaluate specificity level and to  
5 determine optimal conditions for detection of ion gradients by zoospores. Upright microscopes  
6 were used for observation in the horizontal plane (Figure 1A). A microscope setup was adjusted  
7 in a way to position the axis of the lens horizontally for observing displacement in the vertical  
8 plane (Figure 1B). With appropriate ion concentration, three states can be defined and  
9 reproducibly observed (Figure 2A): *(i)* a free state (FREE) corresponding to untreated cells which  
10 are uniformly distributed in the droplet and exhibited random motion; *(ii)* a swarm state (SWA),  
11 accounting for ion treated cells, during which the vast majority of zoospores migrated upward  
12 and gradually constituted a swarm with increasing cell density in a progressively restricted area  
13 within a few minutes; *(iii)* an aggregate state (AGG) corresponding to zoospores forming a  
14 plume when a critical population density is achieved, leading to a downward migration and then  
15 to cell gathering on the support surface.

16           The process occurred with potassium and sodium, whatever the associated anion  
17 (chloride, acetate, permanganate, sulfate) and within the pH range from 5 to 8. Among other  
18 cations, only H<sup>+</sup> application induced similar effects in the tested conditions although H<sup>+</sup>  
19 treatment did not provoke aggregation: application of 0.001 to 0.01 μmoles triggered local but  
20 transitory gathering of zoospores; higher amounts promoted ring formation before extensive  
21 cell death.

1 Aggregation maximized within 12-15 minutes when at the starting point 0.5 to 3  $\mu$ moles of  
2 potassium were applied per 100  $\mu$ l of cell suspension (Movie S1, Figure 2A-D). Assuming that  
3 ionic diffusion flow causes the ionic concentration to tend towards homogeneity, this led at the  
4 equilibrium point to a final range of concentrations of 5 to 30 mM. Lower amounts had no  
5 apparent effect on zoospore motion, while higher ones provoked local cell gathering but no  
6 aggregation and high rate of cell death by osmolysis (not shown).  $\text{Na}^+$  application induced  
7 aggregation but at a higher range than  $\text{K}^+$  (application range: 5 to 30  $\mu$ moles; final  
8 concentration: 50-300 mM).  $\text{K}^+$ -induced-aggregation was observed for cell density extended  
9 from  $10^5$  to  $4 \cdot 10^6$  zoospores/ml with a quorum ranging from  $5 \cdot 10^3$  to  $2 \cdot 10^4$  cells. For further  
10 analyses and in the following, the assays were performed at pH 6.5 by application of 0.5  $\mu$ mole  
11 of KCl per 100  $\mu$ l of cell suspension at  $5 \cdot 10^5$  cells/ml.

### 12 **3.2. Behavior of zoospores sensing potassium**

13 In the FREE state, both horizontal (Figure 2E) and vertical (not shown) trajectories were  
14 determined. A kymograph (Figure 2H) gives the picture of moving zoospores (appearing as  
15 oblique lines) in the horizontal plane, evolving at a velocity  $V_{xy}$  of  $164 \pm 44 \mu\text{m/s}$  (Table 1).  
16 Measurement of  $V_{xz}$  indicated that velocity ( $129 \pm 39 \mu\text{m/s}$ ) was also homogeneously dispersed  
17 (not shown).

18 In the SWA state (3 to 10 min), the trajectories in the horizontal plane were undirected  
19 but limited to the geometry of the swarm (Figure 2C, F). Compared to the FREE state,  $V_{xy}$  in SWA  
20 state was reduced and more variable ( $112 \pm 49 \mu\text{m/s}$ ), with a decrease especially at the swarm  
21 periphery as illustrated on the kymograph by “low”-sloping of lines at the edge of the swarm.

1 Static peripheral zoospores appear as vertical lines parallel to the time axis, while moving ones  
2 within the swarm appear as tilted lines (Figure I). Moreover, swarm formation was correlated  
3 with a continuous upward migration (Movie S2) that culminated with accumulation of almost all  
4 cells at the air-liquid interface, and with only very few cells detected below in the scanned area  
5 (Figure 2L).

6 When observed in the horizontal plane at the AGG state (Figure 2D, G, J) (t=10 to 12 min)  
7 all cells undergo migration with centripetal trajectories in the horizontal plane (Figure 2G), at  
8 very low velocity  $V_{xy}$  ( $24 \pm 9 \mu\text{m/s}$ ) towards a restricted area ( $1 \text{ to } 5 \cdot 10^6 \mu\text{m}^2$ ) at which zoospores  
9 stop their linear movement and form an aggregate (Movie S1, Figure 2D). They appear as static  
10 object on the kymograph (Figure 2J). Once plume was constituted, cells abruptly underwent  
11 downward migration leading to sequential redistribution of zoospores according to a downhill  
12 gradient along the vertical axis (Figure 2M, Movie S3). Redistribution of zoospores along the  
13 vertical axis was correlated with number of cells reaching a mean  $V_{xz}$  of  $38 + 24 \mu\text{m/s}$  in the  
14 vertical plane (Table1). This value was different of those calculated in the other situations  
15 analyzed in this study: zoospores swimming freely ( $128 \pm 35 \mu\text{m/s}$ ) or above front migration  
16 ( $159 \pm 52 \mu\text{m/s}$ ), cells floating below front migration ( $8 \pm 13 \mu\text{m/s}$ ), zoospores fixed with  
17 paraformaldehyde and only submitted to gravity and buoyancy ( $138 \pm 19 \mu\text{m/s}$ ). At the end of  
18 the sequence, zoospores were living and motile (Movie S4), exhibiting flagella (Figure S1) before  
19 progressive and massive encystment.

20 Obviously, displacement of plumes exhibited a high vertical component during down  
21 migration (Movie S5; Figure S2). However, at zoospore population level trajectory and velocity

1 patterns were heterogeneous both in space and time. Velocity patterns revealed higher velocity  
2 for zoospores both in the front of migration and in more central location in the heart of the  
3 plume at the beginning of sedimentation ( $5s < t < 20s$ ). Then, distribution of higher velocities was  
4 limited to central location ( $20s < t < 25s$ ) Figure 3A). At this step, analysis of individual behavior of  
5 zoospore was difficult because of high cell density. The vertical component of trajectories was  
6 revealed only when individualization of particular zoospores could be achieved for extended  
7 time (Figure 3B). For each cell analyzed, the downward migration effectively resides at first in a  
8 virtually rectilinear and vertical displacement, including within an approximate period length of  
9 10-12 seconds. The vertical velocity then reached 50-52  $\mu\text{m/s}$ . A second component of the  
10 displacement follows, consisting of a modification of trajectory patterns which then becomes  
11 helical and a vertical velocity which is highly reduced probably when cells reached the threshold  
12 concentration range defined below (Figure 3B).

### 13 **3.3 Zoospores sensing potassium are distributed according to the ionic gradient**

14 The droplet assay led to heterogeneous and uncontrolled gradient concentration and  
15 was inappropriate to analyze relationships between zoospore and  $\text{K}^+$  extracellular gradient  
16 distribution. To go further in understanding how zoospores behave toward various  
17 concentrations of potassium we generated a diffusion gradient in a millifluidic device (Figure 4A)  
18 consisting basically in one channel, one inlet and one outlet. The cells were loaded into the  
19 channel (l:17 mm; w: 3.8 mm; h: 400  $\mu\text{m}$ ) in the presence of APG-2, a  $\text{K}^+$  sensing probe, prior to  
20 a spot application of KCl at the inlet. The fluorescence dynamic range of APG-2 upon ion binding  
21 and the evolution of zoospore distribution were followed along the channel by confocal

1 microscopy (Figure 4A). The fluorescence intensity was measured for determining  $K^+$   
2 concentration which is plotted in Figure 4B. The measured fluorescent concentration profile  
3 indicated that the dynamic range of  $K^+$  concentration that could be resolved in this device were  
4 respectively [0-17mM] at 1, 3, 5 or 10 min of diffusion. A slight minority of the cell population  
5 was unable to swim mainly at immediate vicinity of the application spot. The vast majority of  
6 zoospores was not altered in motion (velocity and random trajectory, data not shown) but had a  
7 restricted distribution. Cells were submitted to negative chemotaxis [6] and found optimum  
8 conditions for their swimming away from the higher ionic concentrations. The no-swimming  
9 zone expanded over time as the ionic diffusion progressed. The measurement of the APG-2  
10 fluorescence intensity led to determine the range of higher concentrations consistent with the  
11 movement of zoospores at different time points (Figure 4A and C). The cell distribution  
12 depended on the local  $K^+$  concentration. The variation of this concentration at the frontier  
13 between the swimming and no-swimming zones covered the narrow 1–4-mM range according  
14 to the different time points. There was no significant change for this range over time. The  
15 chemotaxis assay was monitored for a period of thirty minutes without observing changes in the  
16 characteristics of zoospore motion in the appropriate swimming zone except their inability to  
17 evolve in the high potassium concentrations. This indicated that  $K^+$ -negative chemotaxis may  
18 initiate but was not sufficient to induce aggregation in these conditions.

### 19 **3.4. Changes in zoospore motion in response to $K^+$ in a microfluidic device**

20 To explore  $K^+$ -induced behavior at the single cell level, zoospores were submitted to  
21 different gradient of KCl in a microfluidic system as explained in the method section. Zoospores



1 were injected in the central inlet into a chemotaxis observation chamber ( $H \times W = 0.2 \text{ mm} \times 1$   
2 mm), with the two side channels being perfused with 100 mM KCl (Figure 5A). The following  
3 cycles were performed: Zoospores and KCl were first injected together; at  $t=0$ , the flow of KCl  
4 was stopped during a time  $T$  (varying from 5s to 15s) to partly flush the KCl; then the flow of  
5 zoospores was also stopped, and the movement of the zoospores was observed during at least  
6 20s. A snap shot of the chamber is shown in Figure 5B (upper picture).

7 In another experiment without zoospores, using the same set-up, a few cycles as  
8 described above were performed with KCl mixed with APG-2 to get the spatiotemporal map of  
9 the potassium concentration in the chamber. Due to the geometry of the microfluidic set-up,  
10 the KCl is concentrated in the upside and downside (on the image) regions of the chamber as  
11 shown on a snap shot in Figure 5B (lower picture).

12 To characterize the migratory process, we tracked cells from  $t=0$  to  $t=20\text{s}$  to extract their  
13 trajectories, calculate the local density of cells, and measure the speed of individual cells. The  
14 area used for this analysis was restricted to the red window shown in Figure 5B. The same area  
15 was selected to calculate the spatiotemporal potassium concentration. Both density of spores  
16 and concentration of potassium were obtained by sliding window method (see §2.4.), by  
17 calculating the mean values in rectangular windows sliding along the direction of the potassium  
18 gradient (the  $Y$  coordinate in our set-up).

19 The results are shown in Figure 6. When the KCl was flushed during 5s, a large majority  
20 of zoospores quickly adopted circular trajectories (Figure 6A and Movie S6) at low speed, below  
21  $40 \mu\text{m/s}$  (fig. 6D and 6G). The residual concentration of potassium was thus supposed to be

1 higher than the threshold of 3-5 mM, and to “freeze” the cells immediately. The concentration  
2 profiles in Figure 6D and 6G are in agreement with this interpretation: after 4s, potassium was  
3 above 5 mM in more than the half of the observed area, and after 16s, the concentration was  
4 above 10 mM in the whole area.

5 When the KCl was flushed during 10s, some zoospores first moved to the central zone  
6 (Figure 6B and Movie S7), as expected to escape upside and downside zones at high potassium  
7 concentration. They had linear trajectories and moved at relatively high speed (above 100  $\mu\text{m/s}$ )  
8 after 4s (Figure 6E). Nevertheless, some cells initially in upside and downside zones adopted  
9 immediately circular trajectories with low speed (Figure 6B and 6E), suggesting that the  
10 concentration of potassium was too high to allow the cells to escape these zones. After a dozen  
11 of seconds, all the cells shifted to low speed-circular trajectories, suggesting that the potassium  
12 had diffused until the central zone and had reached the threshold concentration. Unfortunately,  
13 we were not able to measure the potassium concentration during this cycle. After 16s, in the  
14 central zone, the speed of the cells was below 40  $\mu\text{m/s}$  (Figure 6H), showing that they had  
15 shifted to low speed-circular trajectories.

16 When the KCl was flushed during  $t=15\text{s}$ , the behavior was close to the observations  
17 made for  $T=10\text{s}$ , except that the area where the zoospores moved with linear trajectories at  
18 high speed was greater (Movie S8, Figure 6C and 6F), and that after 16s, the cells went on to  
19 move with high speed-linear trajectories (Figure 6I). This suggests that the concentration of  
20 potassium was sufficiently low to allow the cells to move. The concentration profiles after 4s  
21 and 16s (Figure 6F and 6I) are in agreement, as the concentration is always below 3 mM.

1 Interestingly, it can be noticed that: (i) between, 4s and 16s, the cells tend to migrate to the  
2 central zone, although the potassium is at very low concentration; (ii) after 16s, the  
3 concentration profile seems to be flat, whereas the density of zoospores is peaked. These  
4 observations suggest that a motion leading to aggregation could be trigger here by a cue  
5 different from potassium concentration. More investigations need to be performed to shed light  
6 on this behavior.

7

## 1           **4. Discussion**

2           It has been previously shown that *Phytophthora* auto-aggregation results from  
3 bioconvection pattern formation [17] or from bioconvection combined to positive chemotaxis  
4 [13]. It has also been demonstrated that *Phytophthora* potassium sensory cues regulates  
5 zoospore behavior [5, 6]. In this report, we present *in vitro* evidence that potassium gradient  
6 sensing by *P. parasitica* zoospores is a primary stimulus, which induces a synchronized zoospore  
7 behavior and cell aggregation. The macroscopic pattern is reminiscent of the auto-aggregation  
8 one. The cell behavior evolves during a single bi-phasic temporal sequence different that  
9 previously described for auto-aggregation.

### 10           **4.1. Negative chemotaxis and bioconvection**

11           At first, negative chemotaxis to potassium leads the cells to go to region where  
12 potassium concentration is below the threshold range of 1-4 mM. Then, the spatial  
13 concentration of cells arises as a result of the geometric arrangement. In a droplet, negative  
14 chemotaxis enforces cell concentration through upward migration toward upper surface of the  
15 suspensions. Once the zoospore density exceeds a certain threshold bioconvection occurs. The  
16 suspension surface becomes too dense and zoospores constitute plumes which undergo  
17 downward migration. No apparent positive chemotaxis between formed plumes [13] was  
18 noted. However, the distance separating plumes from each other was variable ( $\approx 0,5$  to 3mm)  
19 rendering difficult the quantification of this parameter in the tested the conditions. At cellular  
20 level, each of the two sequences is characterized by distinct motion parameters (upward cell  
21 concentration and plume downward migration). The congruent results emerging from the droplet

1 (in vertical and horizontal planes) and microfluidic (horizontal plane) assays lead to the  
2 following scheme. As long as  $K^+$ -treated cells have the opportunity to escape from high  
3 concentration areas, they exhibit linear trajectory and turn back toward the areas below the  
4 threshold concentration of 1-4mM, this without measurable interference on velocity (Figure 1,  
5 2, 4). When the conditions force the cells to be located beyond this threshold (Figure 3), two  
6 drastic changes are observed: an important reduction of velocity and a switch from a linear  
7 trajectory to a rotational one. Thus, in most cases, the  $K^+$ -induced aggregation phenomenon is  
8 observed when the motion of a quorum of zoospores ( $5 \cdot 10^3$  -  $2 \cdot 10^4$ ) explores territories which  
9 are delimited by the concentration field and its spatial distribution in the different devices used  
10 here. Although, in the microfluidic devices, it seems that zoospores can stay longer in an  
11 aggregate states when spatiotemporal variation of  $K^+$  gradient are higher, leading to the  
12 hypothesis of a higher response mediated by a signaling behavior between zoospores enhancing  
13 their response.

#### 14 **4.2. Sources for $K^+$ gradient generation in natural environment**

15 The *in vitro* induction by  $K^+$  of zoospore gathering demonstrates that aggregation may  
16 result from perception of an external signal(s). How such gradients can be achieved in natural  
17 habitats? At first glance, they may be generated by efflux mechanisms from zoospores, release  
18 from microbiota sharing the same biotope, rhizospheric activity and/or exchange dynamics in  
19 soil.

20 Self-generation of  $K^+$  by a net  $K^+$  zoospore efflux seems highly unlikely. In freshwater, the  
21 osmolality of the zoospore cytosol is always higher than that of the external environment.

1 Throughout the course of their displacement, a major challenge of (wall-less) zoospores is the  
2 removal of excess of cytosolic water rather than ions for maintaining homeostasis. The water  
3 excess is collected into the contractile vacuole complex (CVC), the osmoregulatory organelle,  
4 and discharged to the extracellular environment [9]. Calculating the  $K^+$  diffusion potential from  
5 cells also rejects the  $K^+$ -zoospore-efflux hypothesis. If we consider high densities ( $10^6$ - $10^7$ /ml) of  
6 zoospores (diameter of 10  $\mu$ m), and  $K^+$  intracellular concentration ranges of 100-200 mM, then  
7 the relative volume expansion rate of the cell population is fluctuated from 0,052 to 0,52%. This  
8 would lead to a  $K^+$  extracellular concentration between 0,05 and 1 mM in the incongruous case  
9 that the whole cell content of potassium would be released by efflux. Thus, it is not plausible to  
10 reach by this way the concentration threshold of 1-4 mM determined in this study as a stimulus  
11 eliciting a pattern reminiscent to auto-aggregation. As in the case of most prokaryotic and  
12 eukaryotic cells [24], we can rather speculate that depolarization due to the increase in  
13 extracellular potassium concentration leads to fluctuations in the membrane potential of  
14 zoospores that could lead to modifications of flagellar beating, cellular responses such as  
15 osmoregulation and/or cell-to-cell signaling.

16 To what extent  $K^+$  release by microbiota sharing the zoospore habitat could mediate  
17 their aggregation remains to be evaluated. Potassium appears to be key in the displacement of  
18 bacteria, in the physical composition of microbiota [24] and in the process of pathogenesis [25].  
19 Electrical signaling mediated by potassium ion channels regulates cell-cell dialogs within a  
20 bacterial biofilm with potassium driving attraction of distant cells of different species [24]. The  
21 range of bacteria-generated gradients that are effective for attracting prokaryotes *in vitro*, is of  
22 the same order of magnitude as that impacting the movement of zoospores in our experimental

1 scheme. Such gradients could therefore have an impact on the distribution of *P. parasitica*  
2 propagules through repulsion.

3         Regarding rhizospheric activity and soil dynamics exchanges, obviously any area that  
4 tends to generate elevated  $K^+$  gradient will also tend to be repelling for *P. parasitica* zoospores.  
5 In soils, the total  $K^+$  contents generally range between 0.4 and 30 g  $kg^{-1}$  [26] with two  
6 components. The soil particles, which bond about 98% of total  $K^+$  content, can constitute main  
7 obstacles for zoospore tracking. The surrounding film of water (2% of total  $K^+$  content) exhibits  
8 an approximate potassium concentration range of 0.2-15mM, that reaches 5-10mM in most  
9 fertigated agricultural soils [26]. Thus, it is reasonable to speculate that  $K^+$  exchange dynamics in  
10 soil constitutes an important parameter for zoospores distribution and aggregation. At the scale  
11 of an infected host plant, zoospores repelled by soil particles and constrained in their  
12 movement in the film of water should be prone to move towards host tissues. This inclination  
13 should be reinforced by the root  $K^+$  uptake causing the formation of a depletion zone around  
14 the root surface [27], and by root exudates which attract zoospores [1, 28]. Thus, the physical  
15 and chemical distribution of  $K^+$  at the soil-root interface is a parameter propitious to  
16 constitution of high density inoculum or biofilm formation on the plant surface. However, its  
17 contribution remains to be established compared to other ion dynamic exchanges such as soil  
18 acidification by roots. A more holistic view of the relationships between the concentration of  
19 various ions and zoospore distribution is required to delimitate the influence of the  $K^+$  one.

20

21         **4.3. Concluding remarks**

1           In this study, we show that potassium gradient sensing induces a synchronized zoospore  
2 behavior (due to negative chemotaxis) and cell aggregation of *P. parasitica* zoospores. In all  
3 various *in vitro* experimental setups that have been used (droplets assays, milli- and micro-  
4 fluidic devices), zoospores present such common behaviors, showing a clear, common response  
5 to Potassium. The use of these different setups also enlightens particularities linked to size and  
6 geometrical effects of each device. Bioconvections patterns that follow aggregation are only  
7 observed in droplet assays. In millifluidic devices, clear and quantitative response to Potassium  
8 gradient is evidenced. The microfluidic devices allowed faster spatiotemporal variations of  
9 Potassium concentration which allow to observe an aggregation process which seems to  
10 constitute a stronger response compare to the one expected for quasi-static negative  
11 chemotaxis. In other words, even when the Potassium concentration drops down to small  
12 values, that zoospores should explore, they stay in an aggregated state. Hence, perspectives of  
13 this work in that direction will consist in looking for signals sent by zoospores in presence of  $K^+$   
14 that would increase their response in term of auto-aggregation behaviors. More complex  
15 microfluidics devices together with a modeling approach are being developed with this aim and  
16 will be the topic of future studies.

17



1 **Table1**

2 **Mean speed of zoospores**

| Velocity | FREE          | SWA           | AGG         |
|----------|---------------|---------------|-------------|
| $V_{xy}$ | 164 ± 44 μm/s | 112 ± 49 μm/s | 24 ± 9 μm/s |
|          | Seq1 n=129    | Seq1 n=96     | Seq1 n=157  |
|          | Seq 2 n=126   | Seq2 n=102    | Seq 2n=155  |
|          | Seq3 n=137    | Seq3 n=99     | Seq3 n=93   |
| $V_{xz}$ | 129 ± 39 μm/s | 146 ± 42 μm/s | 38 ± 24     |
|          | Seq1 n= 187   | Seq1 n=222    | Seq1 n= 25  |
|          | Seq n=208     | Seq2 n=247    | Seq n=14    |
|          | Seq3 n=198    | Seq3 n=176    | Seq3 n=11   |
|          | Seq 4 n=219   | Seq 4 n=185   |             |

3

4

1

## 2 **Figure Legends**

### 3 **Figure 1: Schematic views of the droplet assay**

4 Potassium was applied at the base of each droplet containing zoospores and at a point of  
5 the circumference. Subsequent characterization of metric of zoospore motion and potassium  
6 diffusion was performed based on micrographs generated either in the horizontal (**A**) or vertical  
7 (**B**) planes.

8

### 9 **Figure 2: Zoospore motion in response to K<sup>+</sup> application**

10 (**A**) Summary scheme of distribution and displacement of cell population occurring  
11 during three defined different states: **FREE** for zoospores swimming freely and distributed  
12 randomly before gradient sensing; **SWA** and **AGG** respectively for zoospores forming a swarm  
13 and then an aggregate upon gradient sensing. The range is indicative of the time at which each  
14 sequence occurred after KCl application. (**B**) to (**J**) illustrate patterns observed in the horizontal  
15 plane for zoospore distribution (**B, C, D**), swimming paths (**E, F, G**) and 2D-kymographs drawn for  
16 10 s (**H, I, J**). Swimming paths were recorded for xy coordinates corresponding to the areas  
17 delimited by dotted rectangle in **B, C** and **D** during 2s for (**E, F**) or 4s for (**G**). The color-coded  
18 stands for mean velocity information with range limiting values indicated at the bottom of each  
19 inset in  $\mu\text{m/s}$ . On the kymograph image, the vertical axis represents time (white arrow). the  
20 horizontal axis corresponds to the pixel's intensities along the length of the selected line: a line  
21 ROI of 1500  $\mu\text{m}$  located at the center of the field along the x axis. (**K, L, M**) illustrate distribution

1 and displacement patterns observed in the vertical plane. Upper insets correspond to  
2 representative micrographs for FREE SWA and AGG. Lower insets show histograms of zoospore  
3 number per unit area, over 20 or 30s and at each depth identified by the color code in the 3  
4 states. SWA is correlated with an upward migration (signified by ascending red arrow) while AGG  
5 is correlated to downward migration (descending red arrow). The bi-directional and sequential  
6 movement of cell population results in a 5 to 7-fold increase of local cell density during  
7 downward migration (compared *K* to *M*). Values of zoospore number are the mean calculated  
8 from 3 the consecutive unit areas and based on numeration of particles with size ranging from 3  
9 to 30  $\mu\text{m}$  from converted binary images. Bar sizes: 100  $\mu\text{m}$

10

### 11 **Figure 3: Downward migration**

12 (A) Evolution of trajectory patterns during downward migration in the AGG phase. The  
13 numbers in the square brackets indicate the window time of 5 s elapsed from the onset. The  
14 color-coded stands for mean velocity information and range limiting values are indicated at the  
15 top of each inset ( $\mu\text{m/s}$ ). (B) Velocity parameters for three representative zoospores. The left  
16 panels show trajectories tracked for at least 15 s. Dotted lines delineate distinct facets in  
17 particular the vertical pattern of downward migration and the linear/helical transition  
18 discernable at low part of paths. The upper right panel shows kinetics of vertical velocity. The  
19 lower one shows the map of point density generated from x/z coordinates of each of the 3  
20 trajectories using the gaussian kernel density tool of PAST3 [29]. Scaling gives an estimate of the  
21 number of points per unit area. It should be noted that the low point density is correlated with

1 high vertical velocity. The figure shows the data for a representative experiment. Bar sizes: 100  
2  $\mu\text{m}$ .

3

4 **Figure 4: A potassium gradient drives zoospore distribution in a passive dispersion**  
5 **system.**

6 (A) Zoospores observed in bright field (right panel) and APG-2 fluorescence emission  
7 pattern captured by confocal laser microscopy (left panel) in a millifluidic device. The point blank,  
8 right between well and chamber, indicates site of application of 1  $\mu\text{l}$  of 0,5M KCl at t=0; the  
9 white dotted arrow shows the overall distance screened for analyzing both zoospore distribution  
10 and APG-2-fluorescent signal at different time points (1, 3, 5 and 10 min). The lower panel  
11 illustrates the location of a 0.48  $\text{mm}^2$  area used for the determination of the upper position in  
12 the chamber suitable for zoospore motion. Encircled cells indicate at time t, the location of  
13 those that schematically delimited the superior range of the gradient suitable for zoospore  
14 exploration. (B) Measurement of fluorescent intensity across 10 000  $\mu\text{m}$  of the chamber defining  
15 the concentration profile which exhibits a non-linear gradients pattern. (C) Box plot of the higher  
16 ionic concentration suitable for zoospore motion. Minimum and maximum values are depicted  
17 by white dots; the box signifies the upper and lower quartiles, the mean and the median are  
18 represented respectively by + and a white rectangle within the box for each raw data. Values are  
19 the means of 5, 6, 5 and 4 replicates for 1, 3, 5 and 10 min, respectively.

20

21

1           **Figure 5: Microfluidic device**

2           **(A)** Device picture showing the three inlets and the chemotactic chamber. **(B)** snap shots  
3 of the chamber in bright field (upper), showing zoospores, and in fluorescence (lower), allowing  
4 to map the concentration of potassium in the chamber using fluorescence of APG-2 probe.

5

6           **Figure 6: Trajectories, density profiles and speed of the zoospores in the chamber**

7           Trajectories of the zoospores in the chamber after KCl flushing time equal to 5s **(A)**, 10s  
8 **(B)** and 15s **(C)**, only one tenth of trajectories shown for convenience. **(D-E-F)**: Local density of  
9 zoospores (squares) with color map for the associated velocity, and potassium profile (red  
10 lines), after 4s. **(G-H-I)**: same representations after 16s.

11

12           **Supplementary data legends**

13           **Figure S1 : Distribution of K<sup>+</sup>-treated and aggregated zoospores**

14           Before treatment with potassium, zoospores were stained with 0,001% Nile Red and  
15 mixed with polystyrene 10µm microspheres. After treatment (t=20 min), the  
16 microspheres+zoospores distribution were observed with a bright-field transmitted light  
17 detector **(A)**. The zoospores stained with the fluorescent dye were observed with 514 nm  
18 excitation, ranging from 534 to 700 nm **(B)**. The comparison between **A** and **B** illustrates the  
19 homogenous repartition of microspheres while aggregated zoospores are restricted to an area

1 of  $1,8 \cdot 10^6 \mu\text{m}^2$ . (C) A micrograph showing biflagellate zoospores fixed in 1% paraformaldehyde  
2 immediately after aggregation and then stained with 0,001% Nile Red. Bar sizes 1000  $\mu\text{m}$  in **A**  
3 and **B**; 10 in  $\mu\text{m}$  **C**

#### 4 **Figure S2: Plume sedimentation**

5 **(A)** Time series of selected views illustrating the vertical evolution of a plume  
6 overtime. **(B)** Box plot of the sedimentation rate measured for plumes (at sedimentation front)  
7 and floating isolated cells.

8 **Movie S1:** Sequence of events leading to zoospore aggregation observed by dark field  
9 and upright microscopy (microscope Zeiss Z1, objective 2.5x).

10 **Movie S2** Upward migration observed with a vertical mounted microscope (AxioSkop  
11 Zeiss, Objective 4x)

12 **Movie S3** Downward migration observed with the vertical mounted microscope

13 **Movie S4** Cell population observed 30 min post  $\text{K}^+$ -treatment with both motionless cysts  
14 and zoospores mainly exhibiting an anticlockwise rotation movement.

15 **Movie S5** Vertical displacement of plumes during down migration

16 **Movie S6** Zoospore behavior following KCl flushing during 5s

17 **Movie S7** Zoospore behavior after KCl flushing during 10s

18 **Movie S8** Zoospore behavior after KCl flushing during 15s

19

1           **References**

- 2    [1] Judelson, H.S. & Blanco, F.A. 2005 The spores of Phytophthora: weapons of the plant destroyer. *Nat*  
3    *Rev Microbiol* **3**, 47-58. (doi:10.1038/nrmicro1064).
- 4    [2] Walker, C.A. & van West, P. 2007 Zoospore development in the oomycetes. *Fungal Biology Reviews*  
5    **21**, 10-18. (doi:<http://dx.doi.org/10.1016/j.fbr.2007.02.001>).
- 6    [3] Latijnhouwers, M., Ligterink, W., Vleeshouwers, V.G., van West, P. & Govers, F. 2004 A Galpha  
7    subunit controls zoospore motility and virulence in the potato late blight pathogen Phytophthora  
8    infestans. *Mol Microbiol* **51**, 925-936.
- 9    [4] Narayan, R.D., Blackman, L.M., Shan, W. & Hardham, A.R. 2010 Phytophthora nicotianae  
10   transformants lacking dynein light chain 1 produce non-flagellate zoospores. *Fungal Genet Biol* **47**, 663-  
11   671. (doi:10.1016/j.fgb.2010.04.008).
- 12   [5] Appiah, A.A., van West, P., Osborne, M.C. & Gow, N.A. 2005 Potassium homeostasis influences the  
13   locomotion and encystment of zoospores of plant pathogenic oomycetes. *Fungal Genet Biol* **42**, 213-223.  
14   (doi:10.1016/j.fgb.2004.11.003).
- 15   [6] Cameron, J.N. & Carlile, M.J. 1980 Negative chemotaxis of zoospores of the fungus Phytophthora  
16   palmivora *J Gen Microbiol* **120**, , 347-353.
- 17   [7] Morris, P.F. & Ward, E.W.B. 1992 Chemoattraction of zoospores of the soybean pathogen,  
18   Phytophthora sojae, by isoflavones. *Physiological and Molecular Plant Pathology* **40**, 17-22.  
19   (doi:[http://dx.doi.org/10.1016/0885-5765\(92\)90067-6](http://dx.doi.org/10.1016/0885-5765(92)90067-6)).
- 20   [8] van West, P., Morris, B.M., Reid, B., Appiah, A.A., Osborne, M.C., Campbell, T.A., Shepherd, S.J. &  
21   Gow, N.A.R. 2002 Oomycete plant pathogens use electric fields to target roots. *Molecular Plant-Microbe*  
22   *Interactions* **15**, 790-798. (doi:Doi 10.1094/Mpmi.2002.15.8.790).

- 1 [9] Hardham, A.R. 2007 Cell biology of plant-oomycete interactions. *Cell Microbiol* **9**, 31-39.  
2 (doi:10.1111/j.1462-5822.2006.00833.x).
- 3 [10] Kebdani, N., Pieuchot, L., Deleury, E., Panabieres, F., Le Berre, J.Y. & Gourgues, M. 2010 Cellular and  
4 molecular characterization of *Phytophthora parasitica* appressorium-mediated penetration. *New Phytol*  
5 **185**, 248-257. (doi:10.1111/j.1469-8137.2009.03048.x).
- 6 [11] Le Berre, J.Y., Engler, G. & Panabieres, F. 2008 Exploration of the late stages of the tomato-  
7 *Phytophthora parasitica* interactions through histological analysis and generation of expressed sequence  
8 tags. *New Phytol* **177**, 480-492. (doi:10.1111/j.1469-8137.2007.02269.x).
- 9 [12] Reid, B., Morris, B.M. & Gow, N.A.R. 1995 Calcium-Dependent, Genus-Specific, Autoaggregation of  
10 Zoospores of Phytopathogenic Fungi. *Experimental Mycology* **19**, 202-213. (doi:DOI  
11 10.1006/emyc.1995.1025).
- 12 [13] Savory, A.I.M., Grenville-Briggs, L.J., Wawra, S., van West, P. & Davidson, F.A. 2014 Auto-aggregation  
13 in zoospores of *Phytophthora infestans*: the cooperative roles of bioconvection and chemotaxis. *Journal*  
14 *of the Royal Society Interface* **11**. (doi:ARTN 20140017  
15 10.1098/rsif.2014.0017).
- 16 [14] Larousse, M. & Galiana, E. 2017 Microbial Partnerships of Pathogenic Oomycetes. *PLoS Pathog* **13**,  
17 e1006028. (doi:10.1371/journal.ppat.1006028).
- 18 [15] Larousse, M., Govetto, B., Seassau, A., Etienne, C., Industri, B., Theodorakopoulos, N., Deleury, E.,  
19 Ponchet, M., Panabieres, F. & Galiana, E. 2014 Characterization of PPMUCL1/2/3, three members of a  
20 new oomycete-specific mucin-like protein family residing in *Phytophthora parasitica* biofilm. *Protist* **165**,  
21 275-292. (doi:10.1016/j.protis.2014.03.003).



- 1 [16] Kemen, E. 2014 Microbe-microbe interactions determine oomycete and fungal host colonization.  
2 *Curr Opin Plant Biol* **20**, 75-81. (doi:10.1016/j.pbi.2014.04.005).
- 3 [17] Ochiai, N., Dragiila, M.I. & Parke, J.L. 2011 Pattern swimming of *Phytophthora citricola* zoospores: an  
4 example of microbial bioconvection. *Fungal Biol* **115**, 228-235. (doi:10.1016/j.funbio.2010.12.006).
- 5 [18] Kong, P. & Hong, C. 2010 Zoospore density-dependent behaviors of *Phytophthora nicotianae* are  
6 autoregulated by extracellular products. *Phytopathology* **100**, 632-637. (doi:10.1094/PHYTO-100-7-  
7 0632).
- 8 [19] Galiana, E., Fourre, S. & Engler, G. 2008 *Phytophthora parasitica* biofilm formation: installation and  
9 organization of microcolonies on the surface of a host plant. *Environ Microbiol* **10**, 2164-2171.
- 10 [20] Zheng, L. & Mackrill, J.J. 2016 Calcium Signaling in Oomycetes: An Evolutionary Perspective. *Front*  
11 *Physiol* **7**, 123. (doi:10.3389/fphys.2016.00123).
- 12 [21] McDonald, J.C., Duffy, D.C., Anderson, J.R., Chiu, D.T., Wu, H., Schueller, O.J. & Whitesides, G.M.  
13 2000 Fabrication of microfluidic systems in poly(dimethylsiloxane). *Electrophoresis* **21**, 27-40.  
14 (doi:10.1002/(SICI)1522-2683(20000101)21:1<27::AID-ELPS27>3.0.CO;2-C).
- 15 [22] Sbalzarini, I.F. & Koumoutsakos, P. 2005 Feature point tracking and trajectory analysis for video  
16 imaging in cell biology. *J Struct Biol* **151**, 182-195. (doi:10.1016/j.jsb.2005.06.002).
- 17 [23] Tinevez, J.Y., Perry, N., Schindelin, J., Hoopes, G.M., Reynolds, G.D., Laplantine, E., Bednarek, S.Y.,  
18 Shorte, S.L. & Eliceiri, K.W. 2017 TrackMate: An open and extensible platform for single-particle tracking.  
19 *Methods* **115**, 80-90. (doi:10.1016/j.ymeth.2016.09.016).
- 20 [24] Humphries, J., Xiong, L., Liu, J., Prindle, A., Yuan, F., Arjes, H.A., Tsimring, L. & Suel, G.M. 2017  
21 Species-Independent Attraction to Biofilms through Electrical Signaling. *Cell* **168**, 200-209 e212.  
22 (doi:10.1016/j.cell.2016.12.014).

- 1 [25] Yost, S., Duran-Pinedo, A.E., Krishnan, K. & Frias-Lopez, J. 2017 Potassium is a key signal in host-  
2 microbiome dysbiosis in periodontitis. *Plos Pathogens* **13**. (doi:ARTN e1006457  
3 10.1371/journal.ppat.1006457).
- 4 [26] Sparks, D.L. 1987 Potassium dynamics in soils *Advances in Soil Science*. Springer, pp. 1-63. .
- 5 [27] Maathuis, F.J.M. & Sanders, D. 1996 Mechanisms of potassium absorption by higher plant roots.  
6 *Physiologia Plantarum* **96**, 158-168.
- 7 [28] Gow, N.A.R. 2004 New angles in mycology: studies in directional growth and directional motility (vol  
8 108, pg 5, 2004). *Mycological Research* **108**, 466-410. (doi:10.1017/S0953756204000097).
- 9 [29] Hammer, Ø., Harper, D.A.T. & Ryan, P.D. 2001 PAST: Paleontological Statistics Software Package for  
10 Education and Data Analysis. . *Palaeontologia Electronica* **4**, 9pp.

11

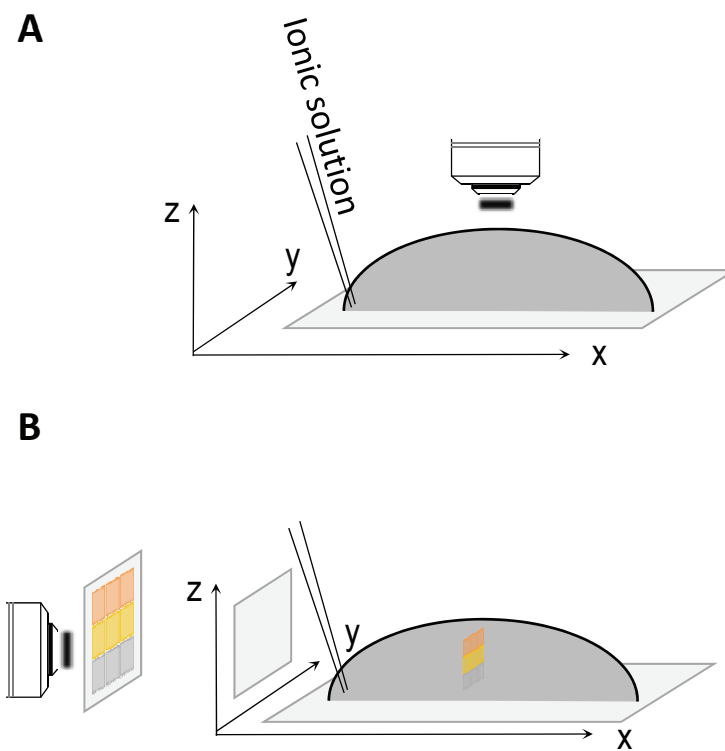

**FIGURE 1**

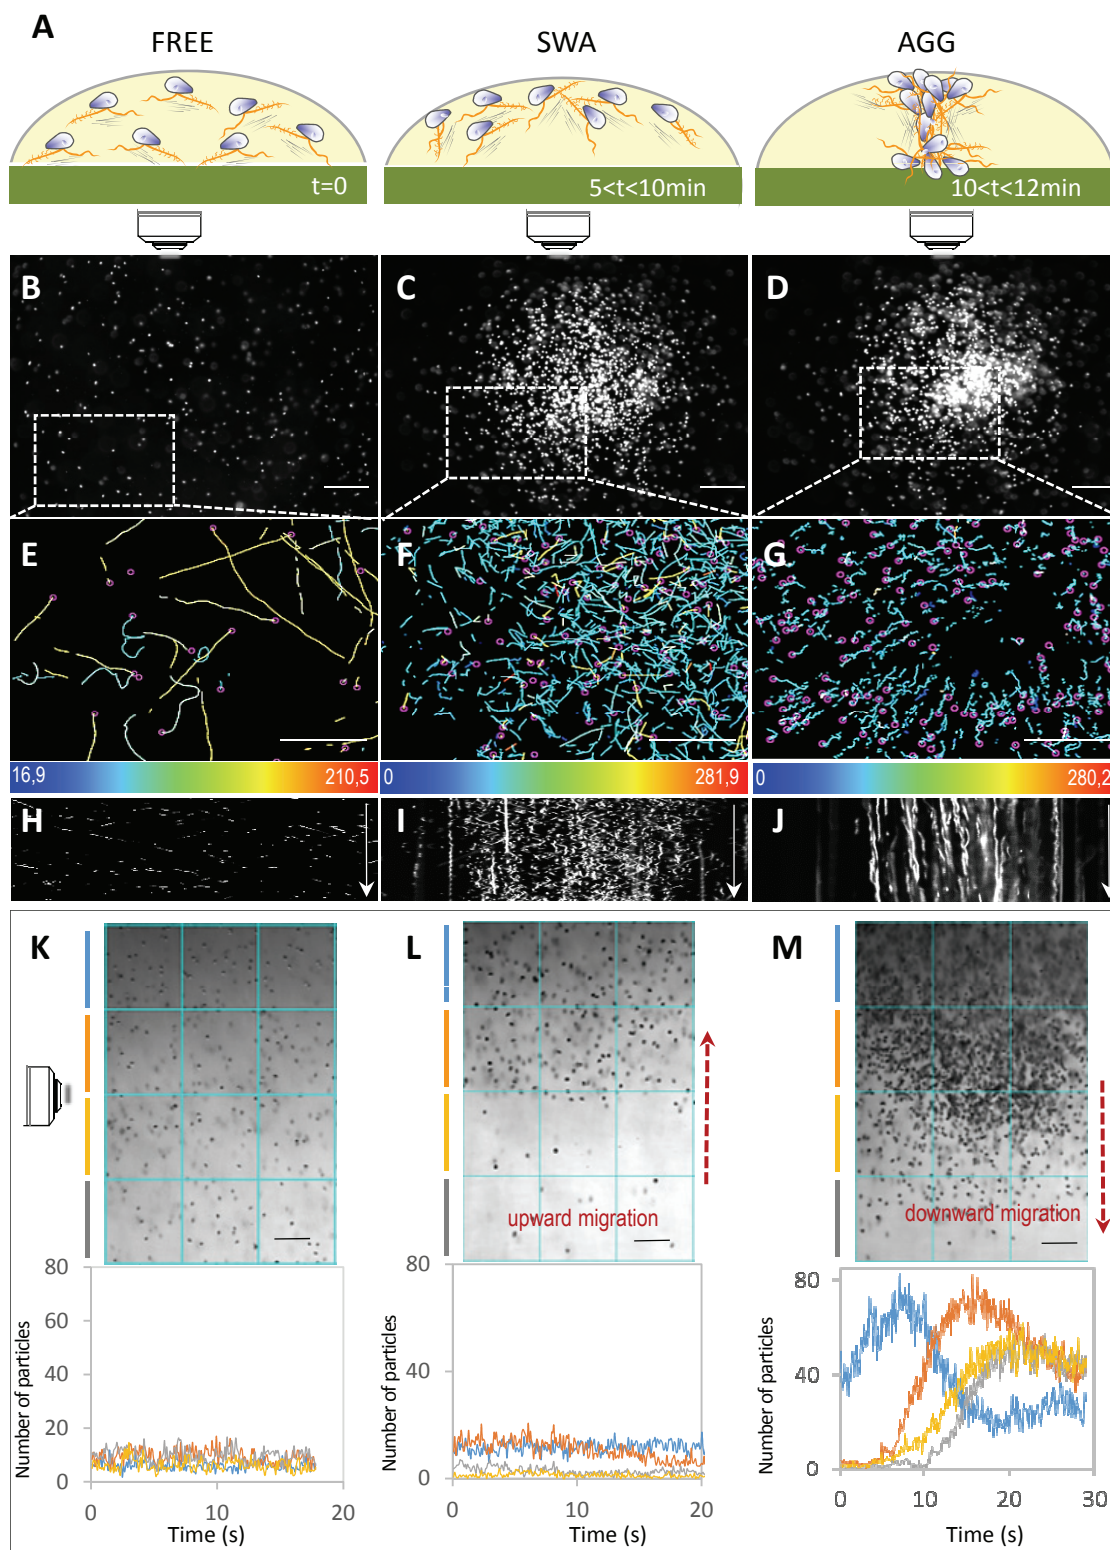

**FIGURE 2**

**A**

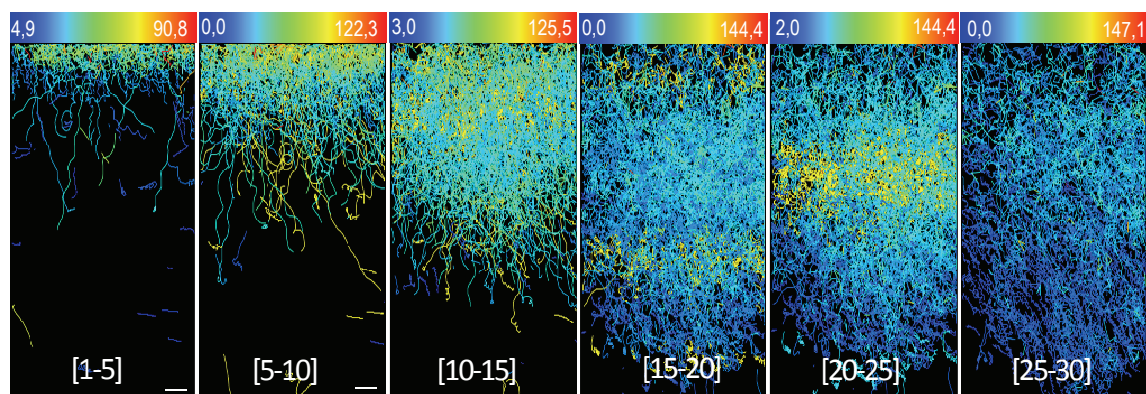

**B**

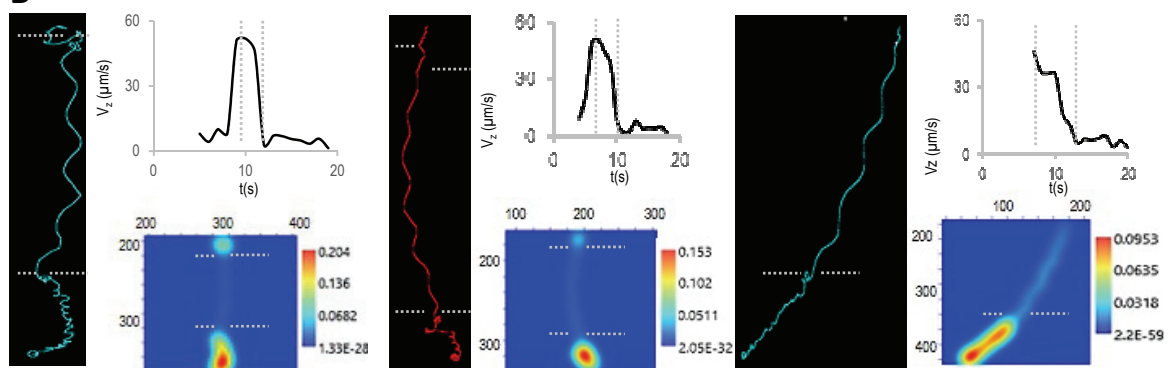

**FIGURE 3**

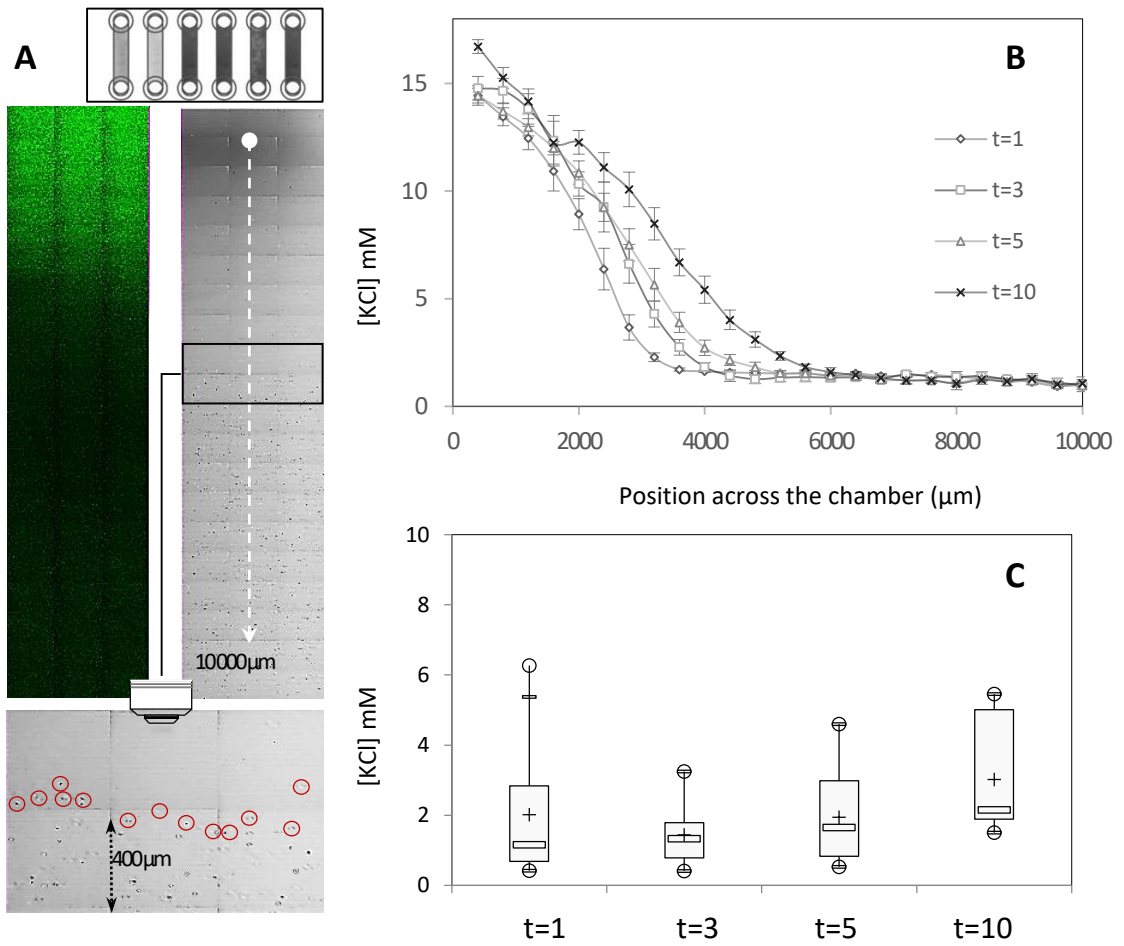

**FIGURE 4**

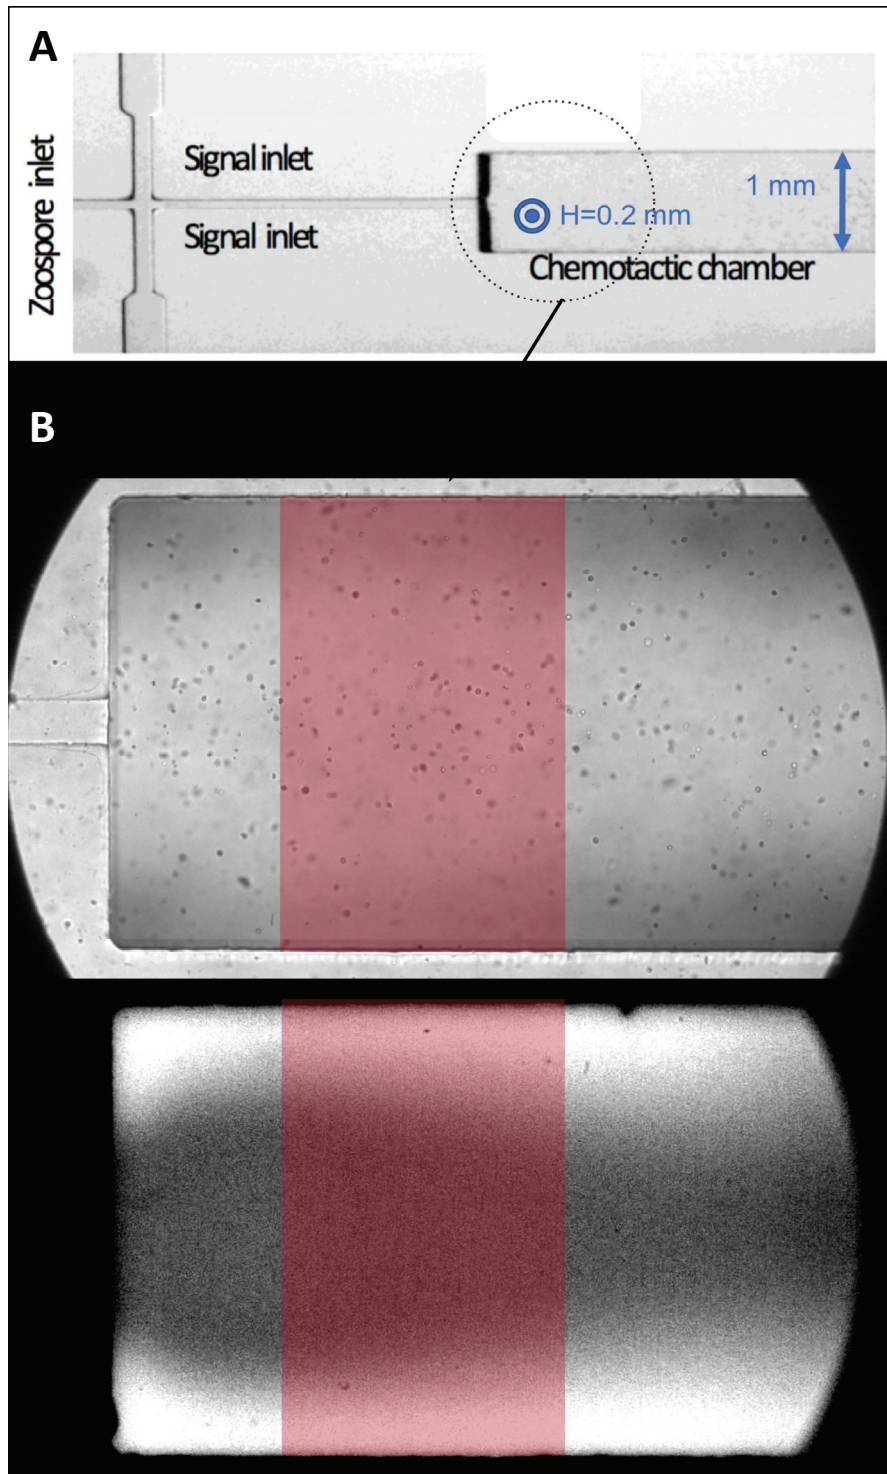

**FIGURE 5**

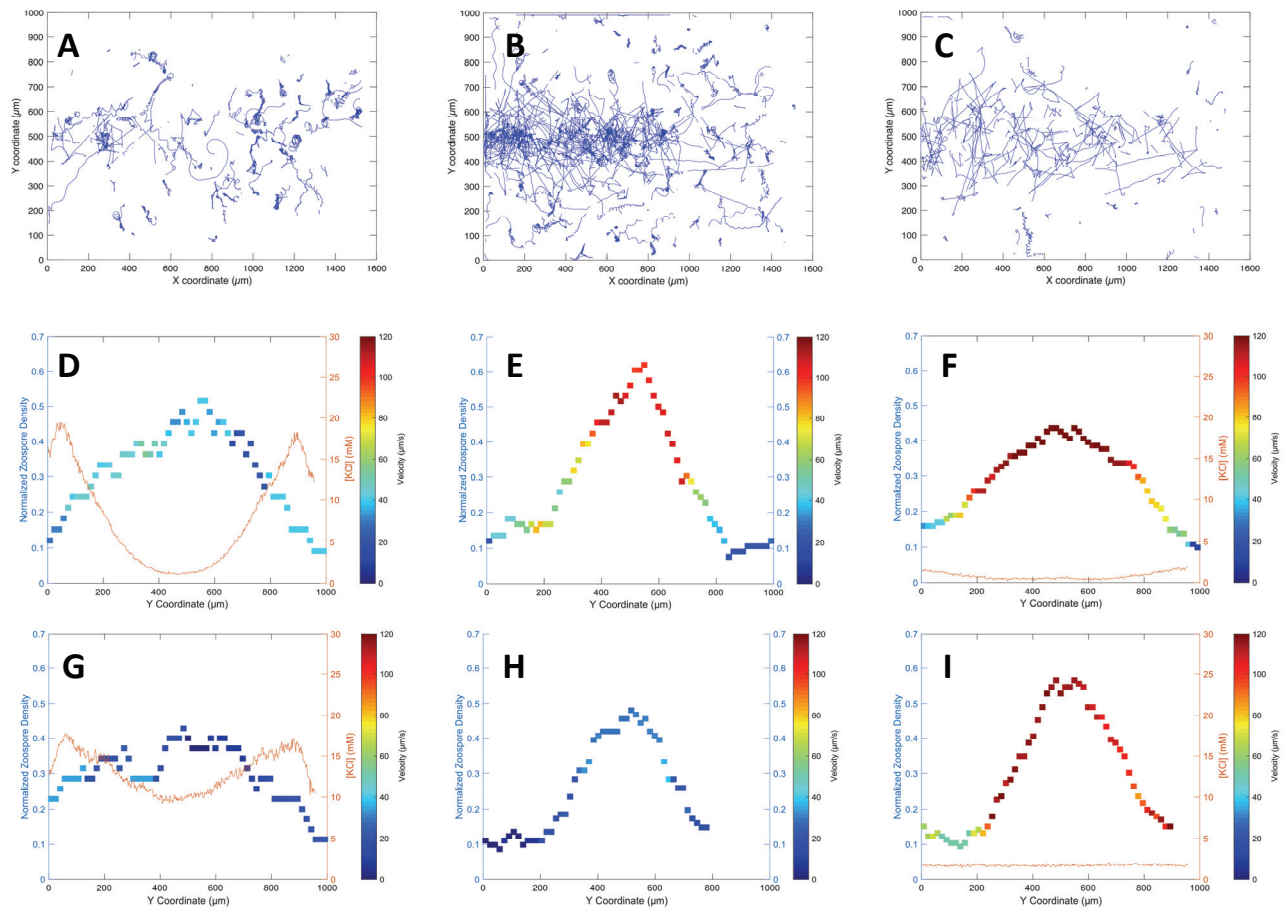

FIGURE 6



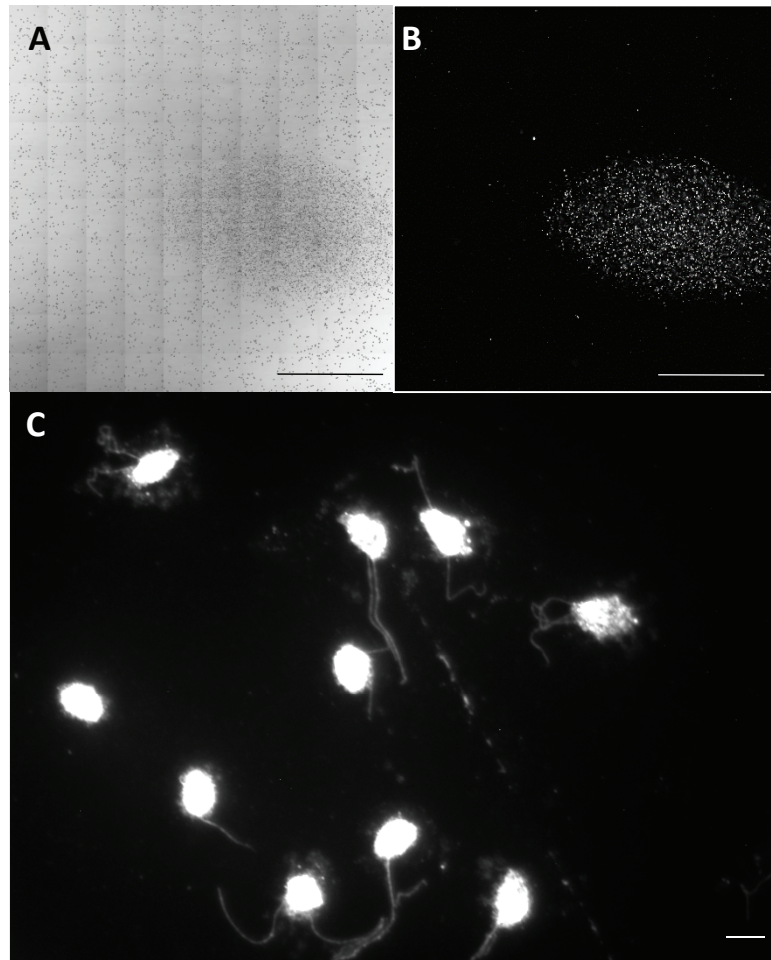

**FIGURE S1**

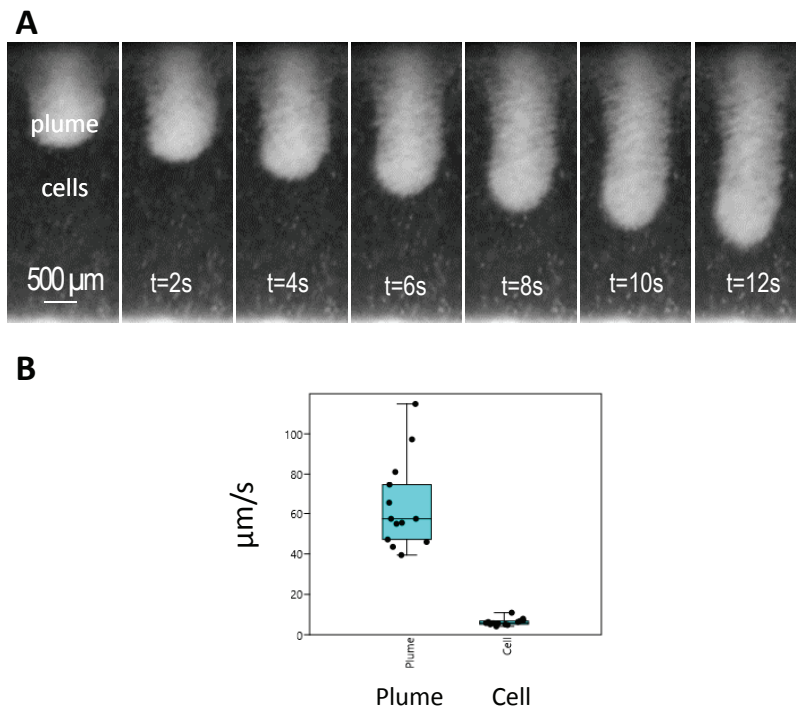

**FIGURE S2**
